# Supplementary figures and images for: Monte Carlo Simulations indicate that Chromati: Nanostructure is accessible by Light Microscopy
Source: Springer Nature journal article supplement (doi:10.1186/1757-5036-3-11), 2010-06-10

# Spatial Nucleosome Distribution of Chromatin

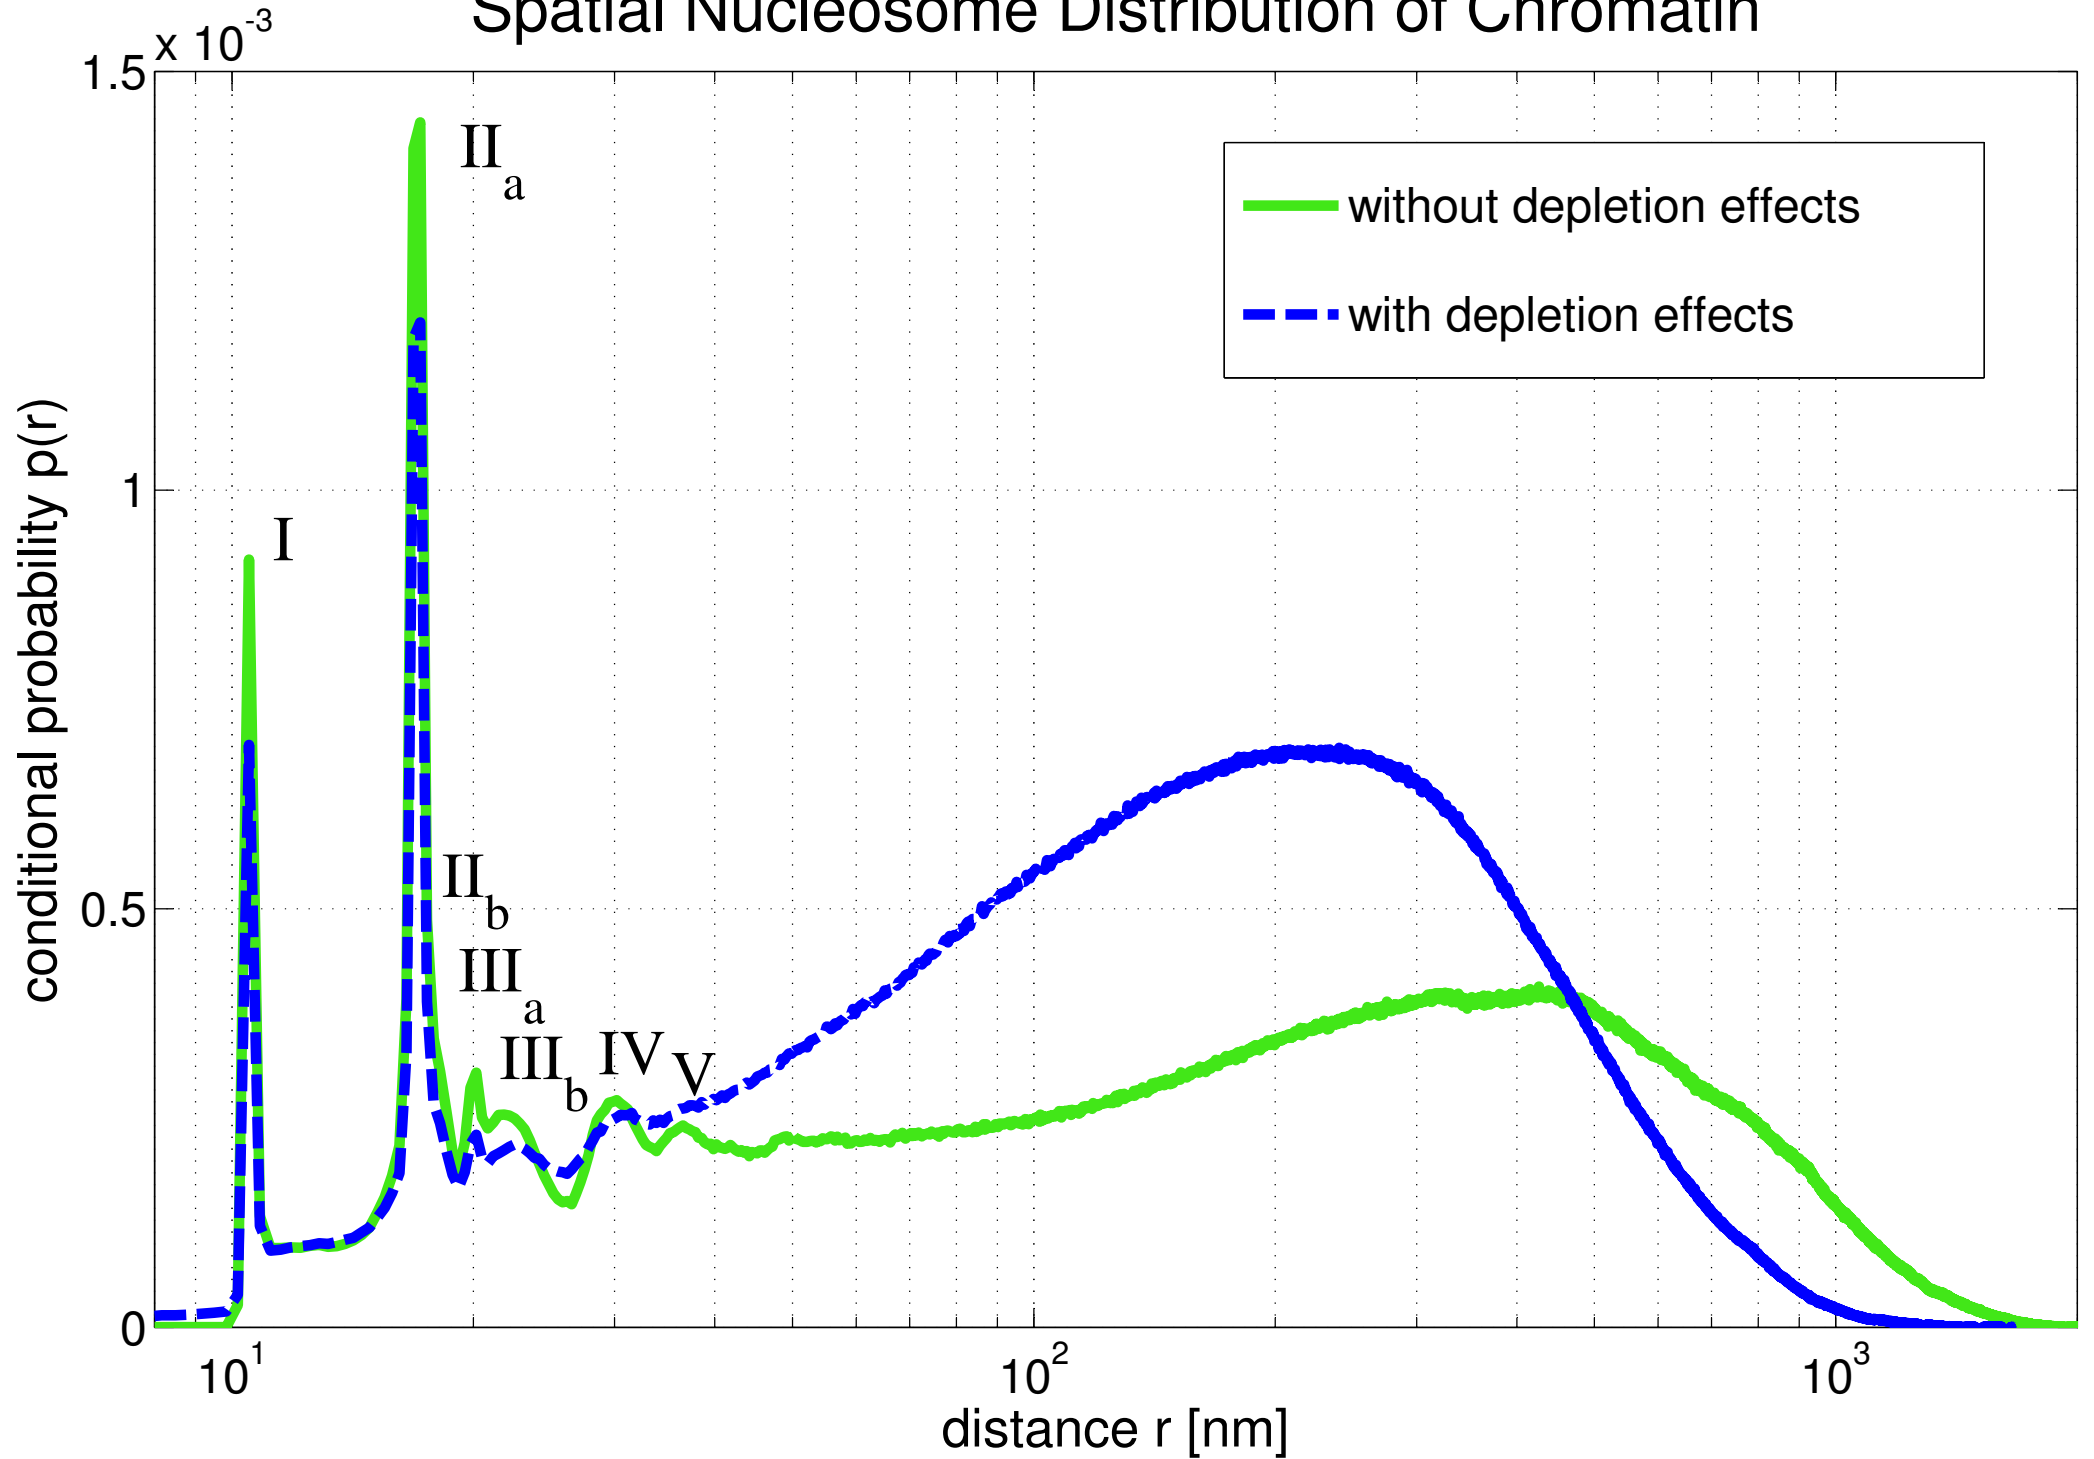

Supplement: Additional file 1 [file 1757-5036-3-11-s1.pdf]
